# Supplementary material for: Hyperglycemia and Stroke Mortality
Source: Oxford University Press journal article supplement (doi:10.2337/dc08-1411), 2008-11-19
Supplement: dc08-1411_investigatoronline_appendix.doc [file dc08-1411_investigatoronline_appendix.doc]

**Studies and investigators in this collaborative study are:**

**Finland** ***East-West:*** A. Nissinen1, J. Pekkanen1, J. Tuomilehto1,2,3, 1. Department of Health Promotion and Chronic Disease Prevention, National Public Health Institute, Helsinki; 2. Department of Public Health, University of Helsinki, Helsinki; 3. South Ostrobothnia Central Hospital, Seinäjoki.

***The National*** ***FinRisk Study 1987 and 1992***: J. Tuomilehto1,2,3, P. Jousilahti2, J. Lindström2,. 1. Department of Public Health, University of Helsinki, Helsinki; 2. Department of Health Promotion and Chronic Disease Prevention, National Public Health Institute, Helsinki; 3. South Ostrobothnia Central Hospital, Seinäjoki.

***The National*** ***FinRisk Study 2002:*** J. Tuomilehto, T. Laatikainen, M. Peltonen and J. Lindström, Department of Health Promotion and Chronic Disease Prevention, National Public Health Institute, Helsinki

***Helsinki Policemen Study***: M. Pyörälä, K. Pyörälä, Department of Medicine, University of Kuopio, Kuopio

***Vantaa Study:*** R. Tilvis1, S. Sairanen1, J. Tuomilehto2,3,4, 1.Division of geriatrics, Department of Medicine, University of Helsinki, Helsinki. 2. Department of Health Promotion and Chronic Disease Prevention, National Public Health Institute, Helsinki; 3. Department of Public Health, University of Helsinki, Helsinki; 4. South Ostrobothnia Central Hospital, Seinäjoki.

**Italy *Cremona Study*:** M.P. Garancini, G. Calori, G. Ruotolo, Clinical Cardiovascular Biology Research Centre, San Raffaele Scientifc Institute, Milan.

**Sweden** ***MONICA:*** M. Eliasson and B. Stegmayr. Department of Public Health and Clinical Medicine, Umeå University, Umeå.

***The Uppsala Longitudinal Study of Adult Men (ULSAM):*** B. Zethelius, Department of Public Health/Geriatrics, Uppsala University Hospital, Uppsala

**The Netherlands** ***The Hoorn Study:*** L.M. Bouter1, J.M. Dekker1, R.J. Heine1, G. Nijpels1, C.D.A. Stehouwer2. 1. Institute for Research in Extramural Medicine, VU University Medical Center, Amsterdam. 2. Dept of Medicine, University Hospital Maastricht, AZ Maastricht.

***Zutphen Study:*** Ed. Feskens, Department of Chronic Disease and Environmental Epidemiology, National Institute of Public Health and Environmental Protection, Bilthoven

**United Kingdom** ***Newcastle Heart Project:*** N. Unwin, N. Ahmad, K. G. M.M. Alberti, L. Hayes. Department of Medicine and Epidemiology and Public Health, University of Newcastle, Newcastle.

***The Goodinge Study:*** R. W. Morris, J. S. Yudkin, M. Gould and A. Haines. Department of Primary Care & Population Sciences, Royal Free and University College Medical School, London.

**Secretariat:**

Q. Qiao1, K. Borch-Johnsen2, J. Tuomilehto1, 1. Diabetes Unit, Department of Health Promotion and Chronic Disease Prevention, National Public Health Institute, Helsinki and Department of Public Health, University of Helsinki, Helsinki, Finland. 2. Steno Diabetes Center, Gentofte, Denmark.

**Data analysis:**

M. Hyvärinen1, Q. Qiao1,2 , L. Zhang1,2  1. Department of Public Health, University of Helsinki, Helsinki, Finland; 2. Diabetes Unit, Department of Health Promotion and Chronic Disease Prevention, National Public Health Institute, Helsinki, Finland.
